# Supplementary material for: Facile dynamical intramolecular exchange of a phosphine ligand between two different metal atoms
Source: Royal Society of Chemistry journal article supplement (doi:10.1039/b001080o), 2000-01-01
Supplement: b001080o.doc [file b001080o.doc]

**Supplementary Material***

**Experimental Details for Synthesis and Structural Analyses of Compounds 2 and 3**.

**Fig. S1** An Eyring plot of Exchange Rates as a Function of Temperature.

**Fig. S2** A plot of the **2a**/**2b** Equilibrium Constants as a Function of Temperature.

___________________________________­________________________________________

# *To accompany paper by Richard D. Adams,* Burjor Captain, Wei Fu and Perry J. Pellechia, “The Facile Dynamical Intramolecular Exchange of a Phosphine Ligand between Two Different Metal Atoms”.

# **Experimental Section**.

**General Data**. Infrared spectra were recorded on a Nicolet 5DXBO FTIR spectrophotometer. 1H NMR and 31P NMR were recorded on a Varian Inova 500 spectrometer operating at 500.16 and 202.47 MHz, respectively.All NMR measurements were made in 1,2-dichlorobenzene-d4 solvent. 31P NMR spectra were externally referenced against 85% *ortho*-H3PO4. Elemental analysis was performed by Desert Analytics (Tucson, AZ). Dimethylphenylphosphine, PPhMe2, was purchased from Aldrich and was used without further purification. PtRu5(C)(CO)16 **(1)** was prepared according to the published procedures. 1 Product separations were performed by TLC in air on Analtech 0.25 and 0.5 mm silica gel 60 Å *F*254 glass plates.

**Reaction of 1 with PPhMe2**. Under an atmosphere of nitrogen, a 12.6 mg amount of **1** (0.011 mmol) was dissolved in 15 mL of freshly distilled CH2Cl2 in a 25 mL three-neck round-bottom flask, to which 1.2 L of PPhMe2 (0.014 mmol) was added via syringe. The reaction mixture was then stirred at room temperature for 30 min, after which the solvent was removed *in vacuo*. The products were separated by TLC using hexane as the developing solvent to yield 3.9 mg (53%) of PtRu5(CO)15(PPhMe2)(µ6-C) **(2)**, and 5.2 mg (39%) of PtRu5(CO)14(PPhMe2)2(µ6-C) **(3)**. Spectral data for **2**: IR CO (cm-1 in CH2Cl2): 2085 (m), 2066 (sh), 2054 (vs), 2037 (vs), 1995 (sh), 1852 (w, br). 1H NMR (1,2-dichlorobenzene-d4): Major Isomer **(2a)**: Minor Isomer (**2b)** = 7:3. **2a**: = 1.78 ppm (d, 6H, CH3, 2JP-H = 10 Hz, 3JPt-H = 53 Hz),  = 7.0 – 7.4 ppm (m, C6H5, obscured by solvent). **2b**: = 1.98 ppm (d, 6H, CH3, 2JP-H = 10 Hz),  = 7.0 – 7.4 ppm (m, C6H5, obscured by solvent). 31P{1H} NMR (1,2-dichlorobenzene-d4): **2a**:  = -10.52 ppm (1JPt-P = 6084 Hz); **2b**: = 9.51 ppm (2JPt-P = 115 Hz).Anal. Calc. C 22.69, H 0.77. Found C 22.92, H 0.76. Spectral data for **3**: IR CO (cm-1 in CH2Cl2): 2069 (m), 2021 (vs), 1968 (sh), 1811 (w, br). 1H NMR (1,2-dichlorobenzene-d4): **50% isomer**:  = 1.85 ppm (d, 6H, CH3, 2J P-H = 9.8 Hz, 3J Pt-H = 51.0 Hz),  = 1.51 ppm (d, 6H, CH3, 2JP-H = 10.8 Hz). **40% isomer**:  = 1.94 ppm (d, 6H, CH3, 2J P-H = 9.5 Hz). **10% isomer**:  = 1.75 – 2.04 ppm J Pt-P and JPt-P superimposed in this region. 31P{1H} NMR (1,2-dichlorobenzene-d4): **50% isomer**:  = -13.450 ppm (d, 1JPt-P = 5999 Hz),  = 9.62 ppm (d, JPt-P = 63 Hz). **40% isomer**:  = 4.35 ppm (2JPt-P = 139 Hz). **10% isomer**:  = -11.80 ppm (d, 1JPt-P = 6111 Hz),  = -1.11 ppm (d, JPt-P too small to measure). Anal. Calc. C 30.46, H 1.93. Found C 30.41, H 1.89.

**NMR Calculations**. Line-shape analyses were performed on a Gateway PC by using the program EXCHANGE written R. E. D. McClung of the Dept. of Chemistry, University of Alberta, Edmonton, Alberta, Canada. Exchange rates were determined at 9 different temperatures in the temperature range 25°C to 130°C. The activation parameters were determined from a best fit Eyring plot using the program Microsoft Excel 97: H† = 15.1(3) kcal/mol and S† = -7.7(9) cal/mol-K for the transformation of the major isomer to the minor isomer, and H† = 14.5(3) kcal/mol and S† = -11.4(9) cal/mol-K for the transformation of the minor isomer to the major isomer. The thermodynamic parameters were derived from a plot of ln K vs 1/T plot of the equilibrium constant K (major isomer **2a**/minor isomer **2b**) determined at 5 different temperatures in the range -5° C to 25° C: H° = 0.58 (8) kcal/mol and S° = 3.7 (3) cal/mol-K.

**Crystallographic Analysis**. Dark red crystals of **2** and **3** suitable for diffraction analysis were grown by slow evaporation of solvent from benzene/octane solutions at room temperature. All crystals used for the diffraction measurements were mounted in thin-walled glass capillaries. Diffraction measurements were made on a Rigaku AFC6S fully automated four-circle diffractometer using graphite-monochromated MoK radiation. The unit cells of the crystals were determined and refined from 15 randomly selected reflections obtained by using the AFC6 automatic search, center, index, and least squares routines. All data processing was performed on a Silicon-Graphics INDIGO2 Workstation by using the TEXSAN structure solving program library obtained from the Molecular Structure, The Woodlands, TX. Neutral atom scattering factors were calculated by the standard procedures.2 Anomalous dispersion corrections were applied to all non-hydrogen atoms.3 Lorentz/polarization (Lp) corrections were applied to the data for each structure. Full matrix least-squares refinements minimized the function: hkl *w*(*Fo* - *Fc*)2, where *w* = 1/2(*F*), (*F*) = (*Fo*2)/2*Fo* and (*Fo*2) = [(*I*raw)2 + (0.06*I*net)2]1/2/Lp.

Compound **2** crystallized in the orthorhombic crystal system. The space group *Pna21* was established on the basis of the systematic absences during the collection of the intensity data. The structure was solved by a combination of direct methods (SIR92) and difference Fourier syntheses. The crystal contains two independent formula units. Because of the large number of atoms, only the platinum, ruthenium, and phosphorus atoms were refined with anisotropic thermal parameters. The hydrogen atoms on the PMe2Ph ligand were calculated by assuming idealized geometry with the C - H distances at 0.95Å. Their scattering contributions were added to the structure factor calculations, but their positions were not refined. Since the space group *Pna21* is polar, a test for the enantiomorph of the crystal was performed by inverting the coordinates of all atoms in the final stages of the refinement and refining again. The second refinement was better than the first. This was thus deemed to be the correct enantiomorph and the results of this refinement are the ones reported herein.

Compound **3** crystallized in the monoclinic crystal system. The space group *P21/m* was identified uniquely on the basis of systematic absences observed during the collection of the intensity data. The structure was solved by a combination of direct methods (SIR92) and difference Fourier syntheses. With Z = 2 the molecule contains crystallographic mirror symmetry. All non-hydrogen atoms were refined with anisotropic thermal parameters. The hydrogen atoms on the PMe2Ph ligand were calculated by assuming idealized geometry with the C - H distances at 0.95Å. Their scattering contributions were added to the structure factor calculations, but their positions were not refined.

## References

1. Adams, R. D.; Wu. W. *J. Cluster Sci.* **1991**, *2*, 271.

International Tables for X-ray Crystallography, vol. IV, Kynoch Press, Birmingham, UK, 1975, Table 2.3.1, pp. 149-150.

1. (a) Brockmann, M.; Dieck, H.; Klauss, J. *J. Organomet. Chem,* **1986**,*301*, 209. (b) Green, M.; Spencer, J. L.; Stone, F. G. A.; Tsipis, C. A. *J. Chem. Soc., Dalton Trans.* **1977**, 1525.
